# Supplementary material for: Bradykinin B1 Receptor Affects Tumor-Associated Macrophage Activity and Glioblastoma Progression
Source: MDPI journal article supplement (doi:10.3390/antiox12081533), 2023-07-31
Supplement: s1 [file s1]

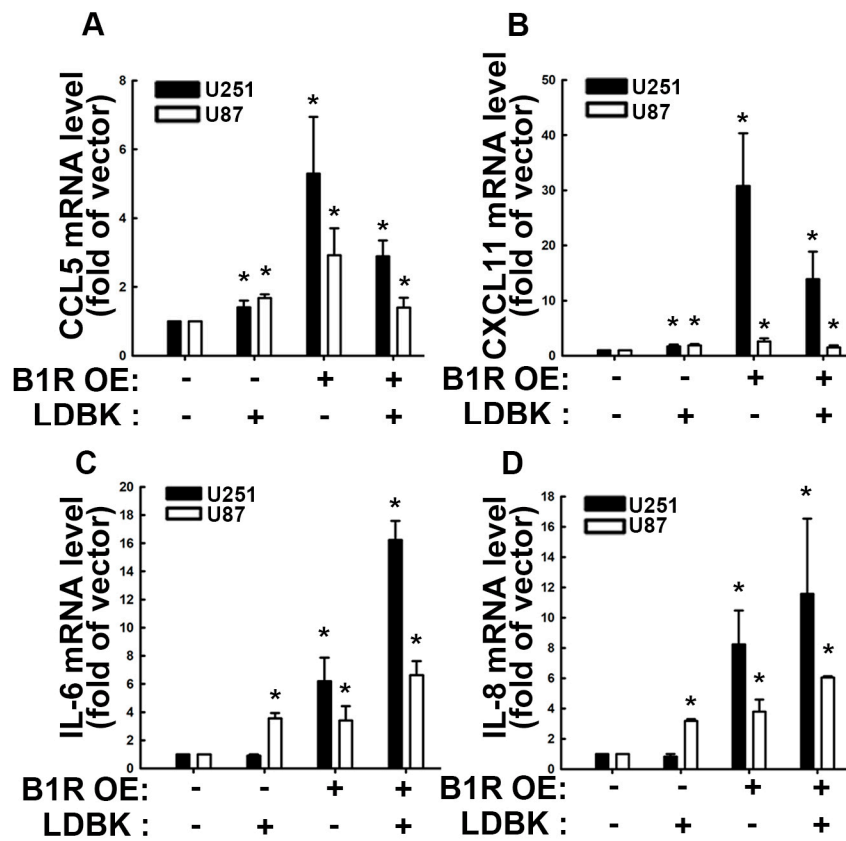

**Figure S1. Effects of LDBK on B1R OE GBM cells.** U251 and U87 human GBM cells were transfected with an EV or B1R-OE plasmid for 24 h before treatment with LDBK (100 nM) for an additional 24 h. The expression levels of CCL5 (A), CXCL11 (B), IL-6 (C), and IL-8 (D) were determined through real-time PCR. Data in the bar graph are presented as the mean  $\pm$  SEM ( $n = 3$ ). The results were analyzed using Student's t-test. \* $p < 0.05$  compared with the vector group.
